# Supplementary material
Source: Springer Nature journal article supplement (https://www.springermedizin.de/resource/supplementary/12885_2011_2971_MOESM7_ESM.pdf/9462352)

Control

75  $\mu$ M magnolol

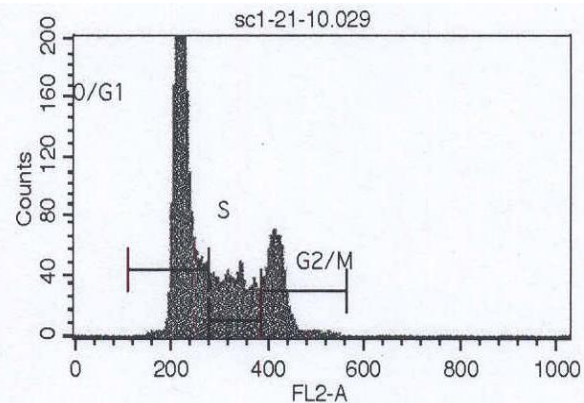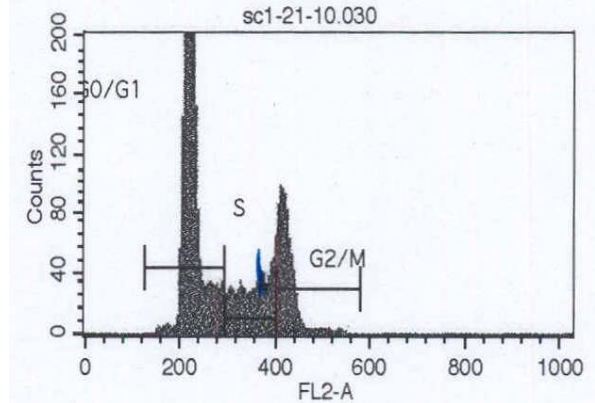

100  $\mu$ M magnolol

125  $\mu$ M magnolol

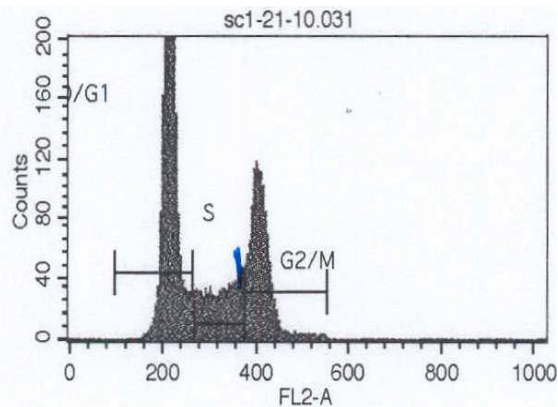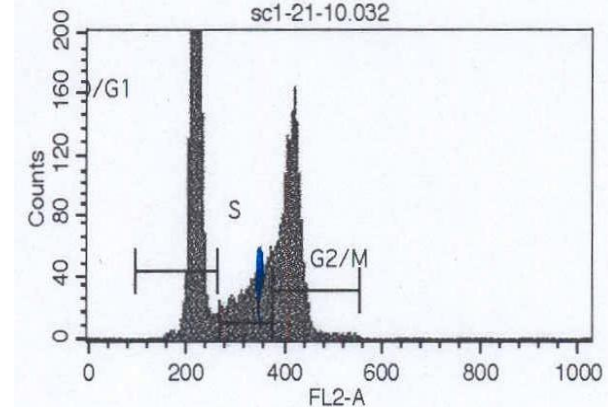

12 h

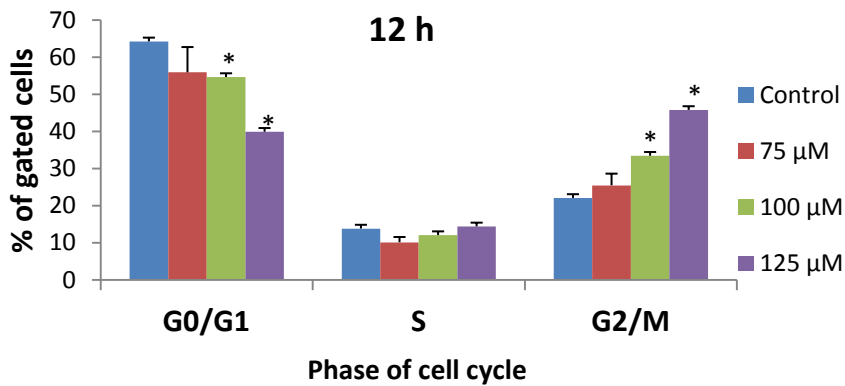

Supplement: MOESM7 [file 9462352]
